# Supplementary material for: The Complete Chloroplast Genome Sequence of Laportea bulbifera (Sieb. et Zucc.) Wedd. and Comparative Analysis with Its Congeneric Species
Source: MDPI journal article supplement (doi:10.3390/genes13122230), 2022-11-28
Supplement: s1 [file s1]

## Supplementary material

### Supplementary table

Table S1. Chloroplast genomes are scattered in repeat sequence characteristic values

| Repeat unit<br>one length<br>(bp) | Repeat<br>Type | The first<br>point of<br>repeat unit | Repeat<br>unit two<br>length<br>(bp) | The second<br>point of<br>repeat unit | Repeat<br>unit<br>interval | E-value  |
|-----------------------------------|----------------|--------------------------------------|--------------------------------------|---------------------------------------|----------------------------|----------|
| 38                                | P              | 165                                  | 38                                   | 165                                   | 0                          | 8.38E-14 |
| 37                                | F              | 42832                                | 37                                   | 96316                                 | 0                          | 3.35E-13 |
| 37                                | P              | 42832                                | 37                                   | 136066                                | 0                          | 3.35E-13 |
| 32                                | P              | 6628                                 | 32                                   | 6628                                  | 0                          | 3.43E-10 |
| 30                                | P              | 7834                                 | 30                                   | 44273                                 | 0                          | 5.49E-09 |
| 28                                | P              | 28811                                | 28                                   | 28844                                 | 0                          | 8.78E-08 |
| 25                                | P              | 206                                  | 25                                   | 235                                   | 0                          | 5.62E-06 |
| 23                                | F              | 42832                                | 23                                   | 117139                                | 0                          | 8.99E-05 |
| 23                                | F              | 96316                                | 23                                   | 117139                                | 0                          | 8.99E-05 |
| 23                                | P              | 117139                               | 23                                   | 136080                                | 0                          | 8.99E-05 |
| 22                                | F              | 68423                                | 22                                   | 120797                                | 0                          | 3.60E-04 |
| 21                                | F              | 7840                                 | 21                                   | 34612                                 | 0                          | 1.44E-03 |
| 21                                | P              | 34612                                | 21                                   | 44276                                 | 0                          | 1.44E-03 |
| 21                                | F              | 66244                                | 21                                   | 66265                                 | 0                          | 1.44E-03 |
| 21                                | F              | 89671                                | 21                                   | 89689                                 | 0                          | 1.44E-03 |
| 21                                | P              | 89671                                | 21                                   | 142709                                | 0                          | 1.44E-03 |
| 21                                | P              | 89689                                | 21                                   | 142727                                | 0                          | 1.44E-03 |
| 21                                | F              | 142709                               | 21                                   | 142727                                | 0                          | 1.44E-03 |
| 20                                | P              | 34680                                | 20                                   | 44215                                 | 0                          | 5.76E-03 |
| 20                                | P              | 35391                                | 20                                   | 35421                                 | 0                          | 5.76E-03 |
| 20                                | P              | 42132                                | 20                                   | 42132                                 | 0                          | 5.76E-03 |
| 20                                | R              | 49468                                | 20                                   | 49468                                 | 0                          | 5.76E-03 |
| 19                                | F              | 4636                                 | 19                                   | 22294                                 | 0                          | 2.30E-02 |
| 19                                | F              | 9319                                 | 19                                   | 35677                                 | 0                          | 2.30E-02 |
| 19                                | F              | 34798                                | 19                                   | 106210                                | 0                          | 2.30E-02 |
| 19                                | P              | 34798                                | 19                                   | 126190                                | 0                          | 2.30E-02 |
| 19                                | R              | 78081                                | 19                                   | 78081                                 | 0                          | 2.30E-02 |
| 19                                | R              | 124094                               | 19                                   | 124094                                | 0                          | 2.30E-02 |
| 18                                | P              | 2833                                 | 18                                   | 2833                                  | 0                          | 9.21E-02 |
| 18                                | R              | 7469                                 | 18                                   | 65507                                 | 0                          | 9.21E-02 |
| 18                                | F              | 17721                                | 18                                   | 45666                                 | 0                          | 9.21E-02 |
| 18                                | P              | 18192                                | 18                                   | 18192                                 | 0                          | 9.21E-02 |
| 18                                | R              | 30408                                | 18                                   | 80670                                 | 0                          | 9.21E-02 |
| 18                                | P              | 31084                                | 18                                   | 64059                                 | 0                          | 9.21E-02 |
| 18                                | C              | 35541                                | 18                                   | 44113                                 | 0                          | 9.21E-02 |

|    |   |        |    |        |   |          |
|----|---|--------|----|--------|---|----------|
| 18 | C | 44122  | 18 | 109609 | 0 | 9.21E-02 |
| 18 | F | 47432  | 18 | 47496  | 0 | 9.21E-02 |
| 18 | R | 57809  | 18 | 64053  | 0 | 9.21E-02 |
| 18 | R | 69674  | 18 | 80669  | 0 | 9.21E-02 |
| 18 | F | 80801  | 18 | 110252 | 0 | 9.21E-02 |
| 18 | P | 99684  | 18 | 105958 | 0 | 9.21E-02 |
| 18 | F | 99684  | 18 | 126443 | 0 | 9.21E-02 |
| 18 | F | 105958 | 18 | 132717 | 0 | 9.21E-02 |
| 18 | C | 111866 | 18 | 122668 | 0 | 9.21E-02 |
| 18 | R | 124256 | 18 | 124256 | 0 | 9.21E-02 |
| 18 | P | 126443 | 18 | 132717 | 0 | 9.21E-02 |
| 17 | R | 6197   | 17 | 6197   | 0 | 3.68E-01 |
| 17 | R | 8304   | 17 | 8304   | 0 | 3.68E-01 |
| 17 | P | 8760   | 17 | 17714  | 0 | 3.68E-01 |

Note: P = palindromic repeat, F = forward repeat, R = reverse repeat, and C = complement repeat.

Table S2. Codon Usage in this chloroplast genome

| Codon | Amino acid | Frequency | Number |
|-------|------------|-----------|--------|
| GCA   | A          | 14.191    | 635    |
| GCC   | A          | 8.135     | 364    |
| GCG   | A          | 6.66      | 298    |
| GCT   | A          | 23.645    | 1058   |
| TGC   | C          | 3.241     | 145    |
| TGT   | C          | 9.208     | 412    |
| GAC   | D          | 7.978     | 357    |
| GAT   | D          | 30.662    | 1372   |
| GAA   | E          | 38.573    | 1726   |
| GAG   | E          | 12.113    | 542    |
| TTC   | F          | 18.102    | 810    |
| TTT   | F          | 41.546    | 1859   |
| GGA   | G          | 24.896    | 1114   |
| GGC   | G          | 8.448     | 378    |
| GGG   | G          | 11.778    | 527    |
| GGT   | G          | 21.432    | 959    |
| CAC   | H          | 5.766     | 258    |
| CAT   | H          | 18.817    | 842    |
| ATA   | I          | 27.556    | 1233   |
| ATC   | I          | 15.219    | 681    |
| ATT   | I          | 40.92     | 1831   |
| AAA   | K          | 43.356    | 1940   |
| AAG   | K          | 12.359    | 553    |
| CTA   | L          | 13.565    | 607    |
| CTC   | L          | 6.995     | 313    |
| CTG   | L          | 6.928     | 310    |

|     |   |        |      |
|-----|---|--------|------|
| CTT | L | 22.773 | 1019 |
| TTA | L | 34.461 | 1542 |
| TTG | L | 21.253 | 951  |
| ATG | M | 22.639 | 1013 |
| AAC | N | 10.861 | 486  |
| AAT | N | 37.88  | 1695 |
| CCA | P | 11.398 | 510  |
| CCC | P | 9.297  | 416  |
| CCG | P | 5.699  | 255  |
| CCT | P | 14.661 | 656  |
| CAA | Q | 27.757 | 1242 |
| CAG | Q | 8.023  | 359  |
| AGA | R | 17.231 | 771  |
| AGG | R | 7.397  | 331  |
| CGA | R | 13.633 | 610  |
| CGC | R | 4.403  | 197  |
| CGG | R | 4.805  | 215  |
| CGT | R | 12.448 | 557  |
| AGC | S | 5.23   | 234  |
| AGT | S | 14.795 | 662  |
| TCA | S | 14.705 | 658  |
| TCC | S | 11.509 | 515  |
| TCG | S | 6.213  | 278  |
| TCT | S | 21.454 | 960  |
| ACA | T | 16.18  | 724  |
| ACC | T | 7.8    | 349  |
| ACG | T | 5.565  | 249  |
| ACT | T | 21.142 | 946  |
| GTA | V | 19.465 | 871  |
| GTC | V | 5.922  | 265  |
| GTG | V | 7.554  | 338  |
| GTT | V | 20.806 | 931  |
| TGG | W | 17.432 | 780  |
| TAC | Y | 7.487  | 335  |
| TAT | Y | 30.662 | 1372 |
| TAA | * | 3.039  | 136  |
| TAG | * | 2.078  | 93   |
| TGA | * | 2.257  | 101  |

Table S3. Predicted RNA editing site in *L.bubifera* chloroplast genome

| Gene                  | Nt Pos | AA Pos | Align Col | Effect             | Score |
|-----------------------|--------|--------|-----------|--------------------|-------|
| <i>accD</i> (C = 0.8) | 821    | 274    | 303       | GCC (A) => GTC (V) | 0.8   |
|                       | 1388   | 463    | 504       | CCT (P) => CTT (L) | 1     |
|                       | 1460   | 487    | 528       | ACC (T) => ATC (I) | 1     |
| <i>atpA</i> (C = 0.8) | 791    | 264    | 264       | CCC (P) => CTC (L) | 1     |

|                        |      |     |     |                    |      |
|------------------------|------|-----|-----|--------------------|------|
| <i>atpB</i> (C = 0.8)  | 29   | 10  | 12  | GCT (A) => GTT (V) | 0.86 |
|                        | 31   | 11  | 13  | CCC (P) => TCC (S) | 1    |
| <i>atpF</i> (C = 0.8)  | 92   | 31  | 31  | CCA (P) => CTA (L) | 0.86 |
| <i>clpP</i> (C = 0.8)  | 559  | 187 | 187 | CAC (H) => TAC (Y) | 1    |
| <i>matK</i> (C = 0.8)  | 52   | 18  | 18  | CTC (L) => TTC (F) | 1    |
| <i>ndhA</i> (C = 0.8)  | 658  | 220 | 233 | CAT (H) => TAT (Y) | 1    |
|                        | 853  | 285 | 298 | CAT (H) => TAT (Y) | 1    |
|                        | 1205 | 402 | 415 | TCA (S) => TTA (L) | 0.86 |
|                        | 68   | 23  | 23  | GCT (A) => GTT (V) | 0.8  |
|                        | 107  | 36  | 36  | CCT (P) => CTT (L) | 1    |
|                        | 566  | 189 | 189 | TCA (S) => TTA (L) | 1    |
|                        | 853  | 285 | 285 | CAC (H) => TAC (Y) | 1    |
|                        | 1079 | 360 | 360 | TCT (S) => TTT (F) | 1    |
|                        | 149  | 50  | 50  | TCA (S) => TTA (L) | 1    |
|                        | 467  | 156 | 156 | CCA (P) => CTA (L) | 1    |
| <i>ndhB</i> (C = 0.8)  | 542  | 181 | 181 | ACG (T) => ATG (M) | 1    |
|                        | 586  | 196 | 196 | CAT (H) => TAT (Y) | 1    |
|                        | 611  | 204 | 204 | TCA (S) => TTA (L) | 0.8  |
|                        | 737  | 246 | 246 | CCA (P) => CTA (L) | 1    |
|                        | 746  | 249 | 249 | TCT (S) => TTT (F) | 1    |
|                        | 830  | 277 | 277 | TCA (S) => TTA (L) | 1    |
|                        | 836  | 279 | 279 | TCA (S) => TTA (L) | 1    |
|                        | 1112 | 371 | 371 | TCA (S) => TTA (L) | 1    |
|                        | 1255 | 419 | 419 | CAT (H) => TAT (Y) | 1    |
|                        | 1481 | 494 | 494 | CCA (P) => CTA (L) | 1    |
| <i>ndhD</i> (C = 0.8)  | 29   | 10  | 10  | ACG (T) => ATG (M) | 1    |
|                        | 340  | 114 | 114 | CGG (R) => TGG (W) | 0.8  |
|                        | 410  | 137 | 137 | CCA (P) => CTA (L) | 1    |
|                        | 626  | 209 | 209 | TCA (S) => TTA (L) | 1    |
|                        | 701  | 234 | 234 | TCA (S) => TTA (L) | 1    |
|                        | 905  | 302 | 302 | TCA (S) => TTA (L) | 1    |
|                        | 914  | 305 | 305 | CCT (P) => CTT (L) | 1    |
|                        | 1325 | 442 | 442 | TCA (S) => TTA (L) | 0.8  |
|                        | 1432 | 478 | 478 | CTT (L) => TTT (F) | 0.8  |
|                        | 196  | 66  | 66  | CCT (P) => TCT (S) | 1    |
| <i>ndhF</i> (C = 0.8)  | 1427 | 476 | 476 | ACA (T) => ATA (I) | 0.8  |
| <i>ndhG</i> (C = 0.8)  | 314  | 105 | 105 | ACA (T) => ATA (I) | 0.8  |
|                        | 494  | 165 | 165 | GCC (A) => GTC (V) | 0.8  |
| <i>psbE</i> (C = 0.8)  | 214  | 72  | 72  | CCT (P) => TCT (S) | 1    |
| <i>psbF</i> (C = 0.8)  | 77   | 26  | 26  | TCT (S) => TTT (F) | 1    |
| <i>rpl2</i> (C = 0.8)  | 547  | 183 | 186 | CCC (P) => TCC (S) | 1    |
| <i>rpoA</i> (C = 0.8)  | 830  | 277 | 279 | TCA (S) => TTA (L) | 1    |
| <i>rpoC1</i> (C = 0.8) | 41   | 14  | 14  | TCG (S) => TTG (L) | 1    |
|                        | 191  | 64  | 64  | ACA (T) => ATA (I) | 1    |

|                        |      |     |     |                    |      |
|------------------------|------|-----|-----|--------------------|------|
|                        | 1550 | 517 | 534 | ACG (T) => ATG (M) | 0.86 |
| <i>rps2</i> (C = 0.8)  | 248  | 83  | 83  | TCA (S) => TTA (L) | 1    |
| <i>rps14</i> (C = 0.8) | 80   | 27  | 27  | TCA (S) => TTA (L) | 1    |
|                        | 149  | 50  | 53  | CCA (P) => CTA (L) | 1    |
| <i>rps16</i> (C = 0.8) | 212  | 71  | 71  | TCA (S) => TTA (L) | 0.83 |

## Supplementary figure

Figure S1. Global alignment of eight chloroplast genomes of *Laportea* using mVISTA. Y-axis indicates the range of identity (50~100%). Alignment was performed using *L. aestuans* as a reference.

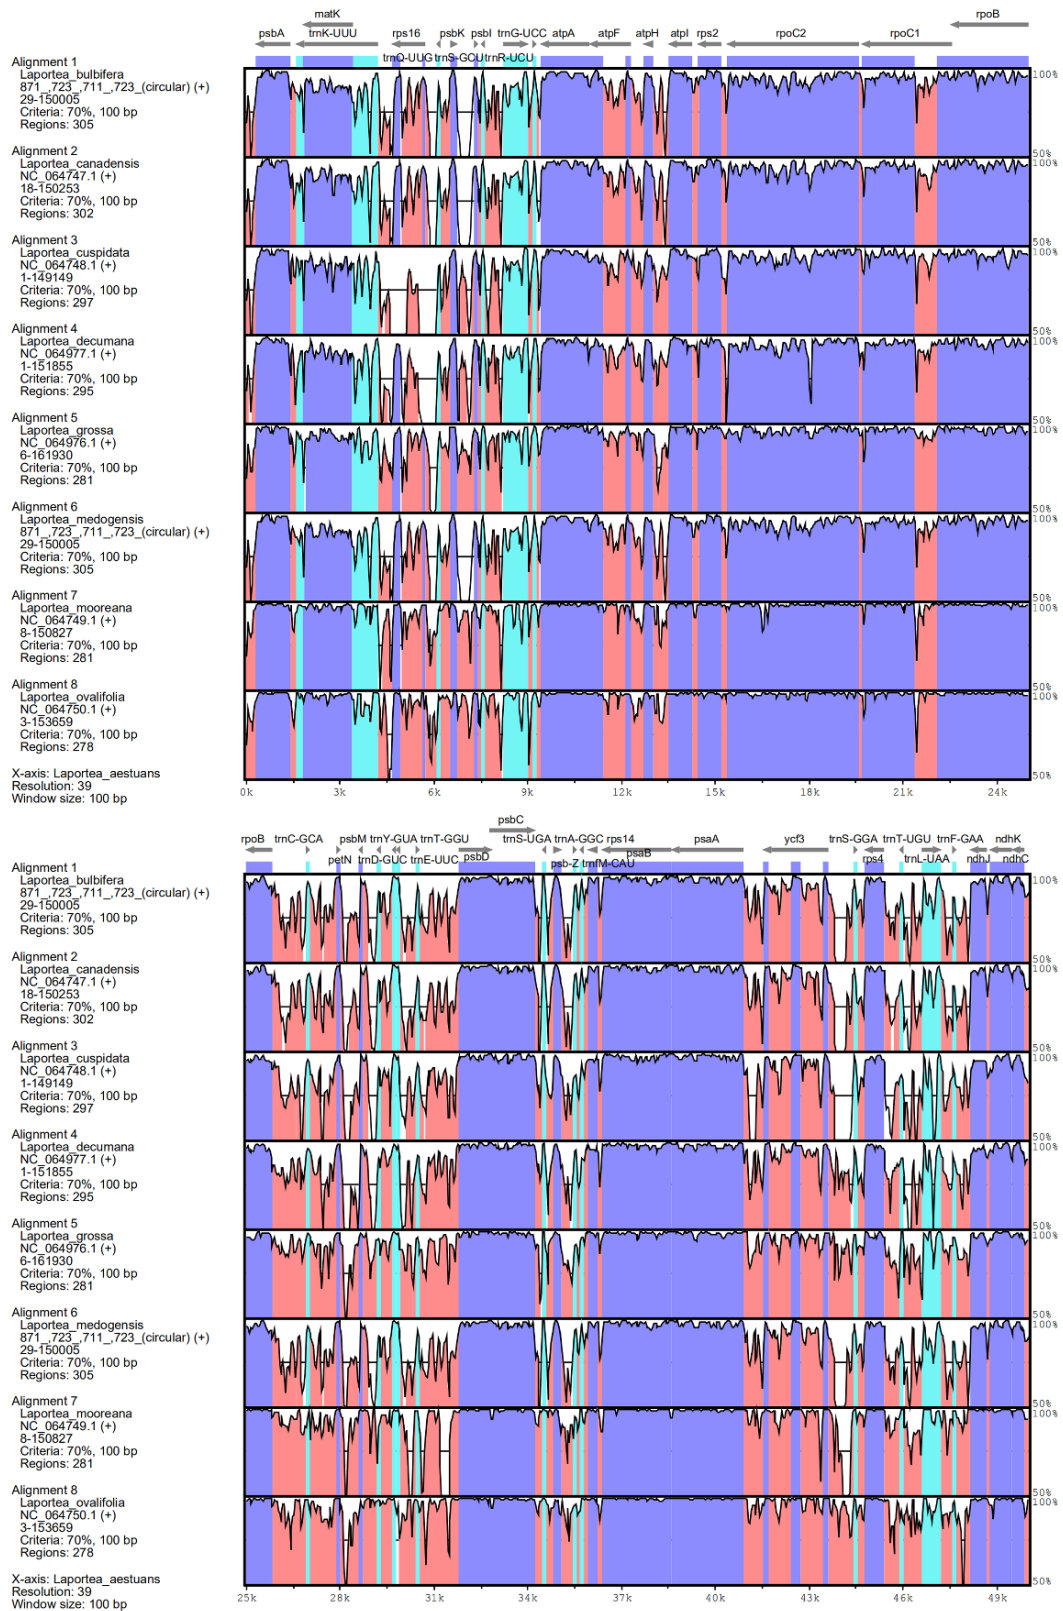

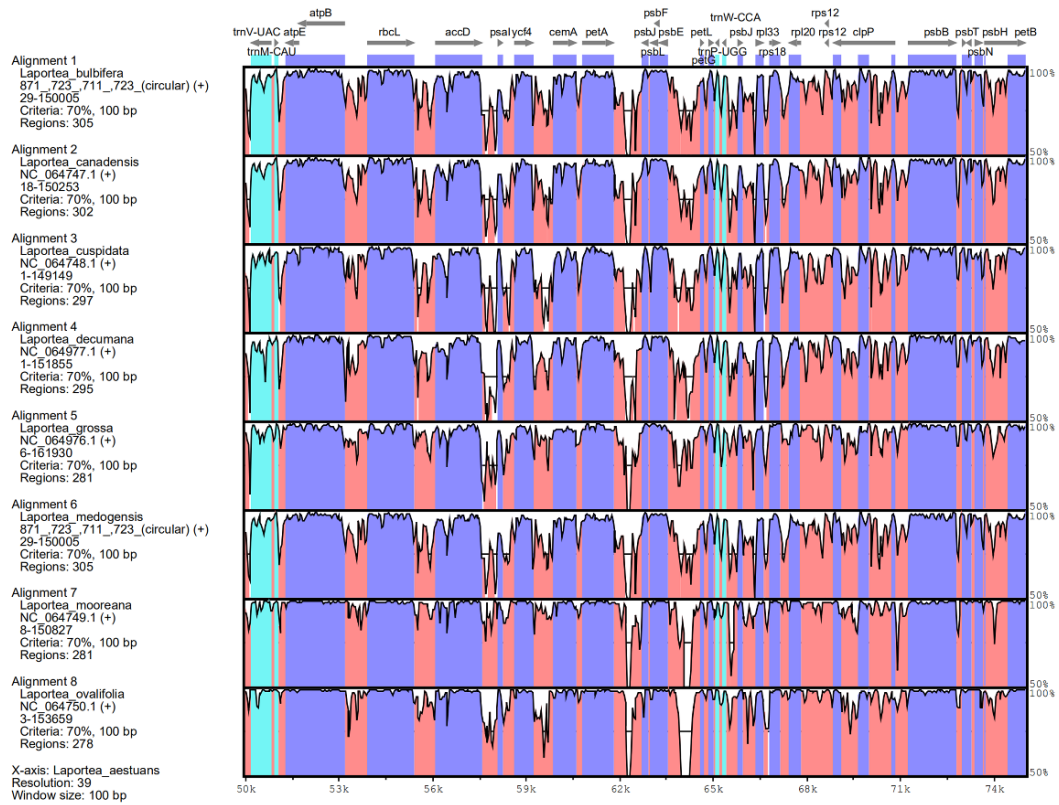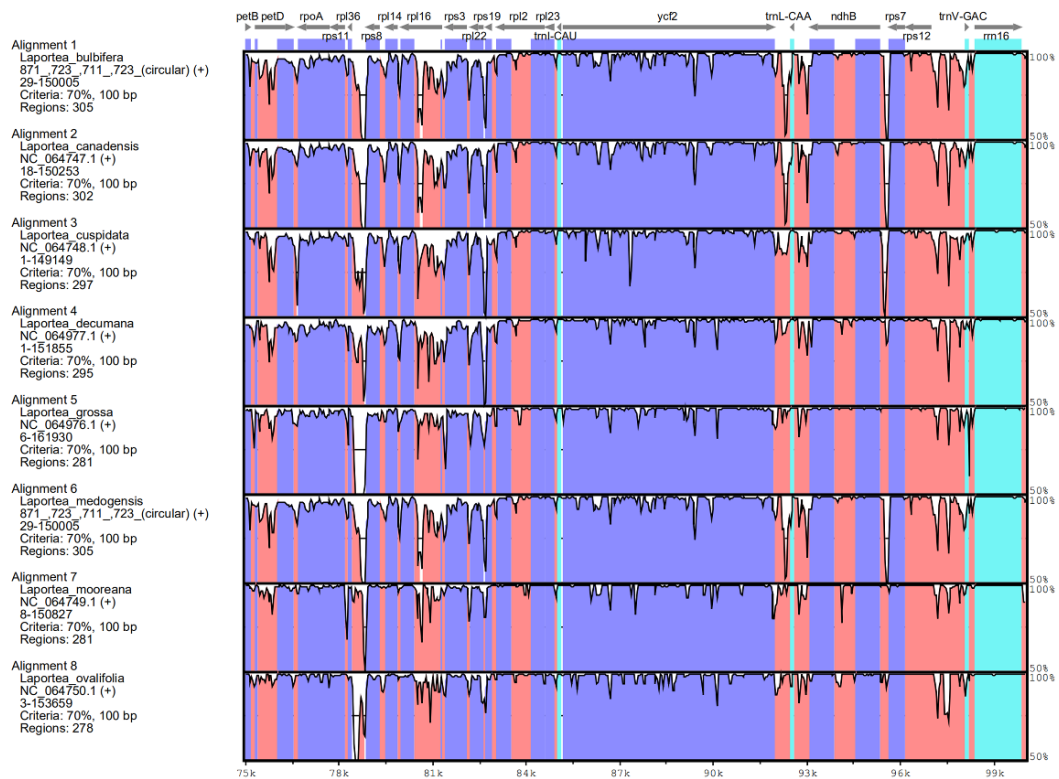

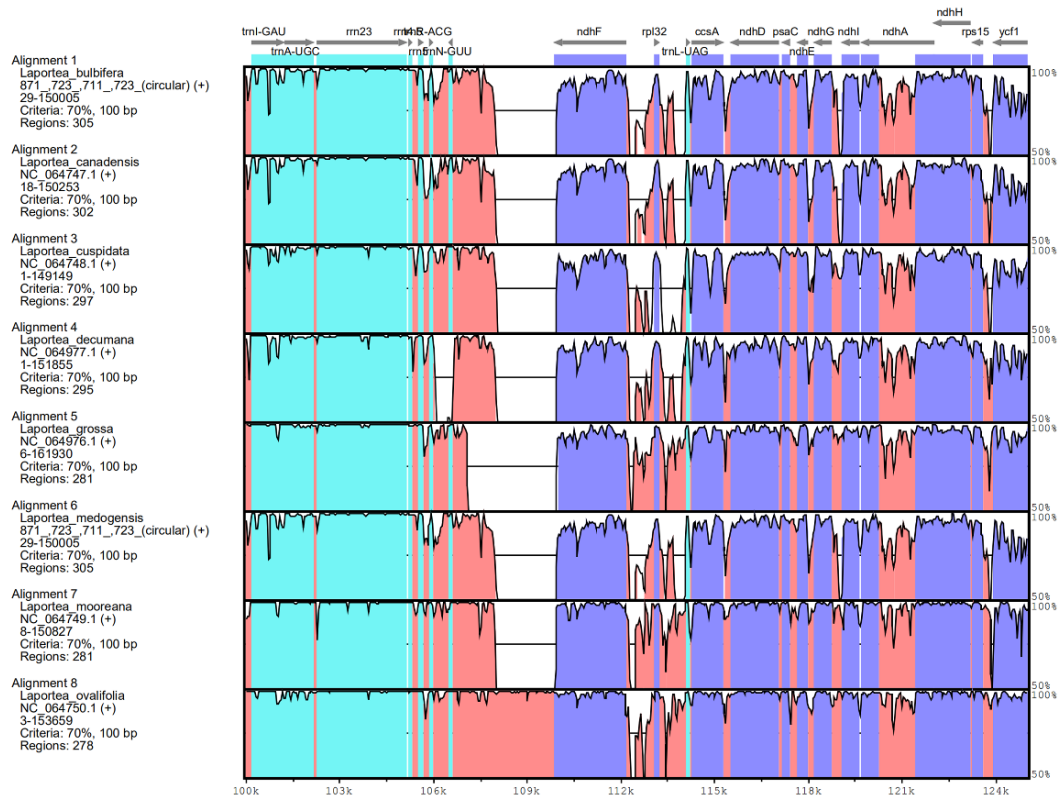



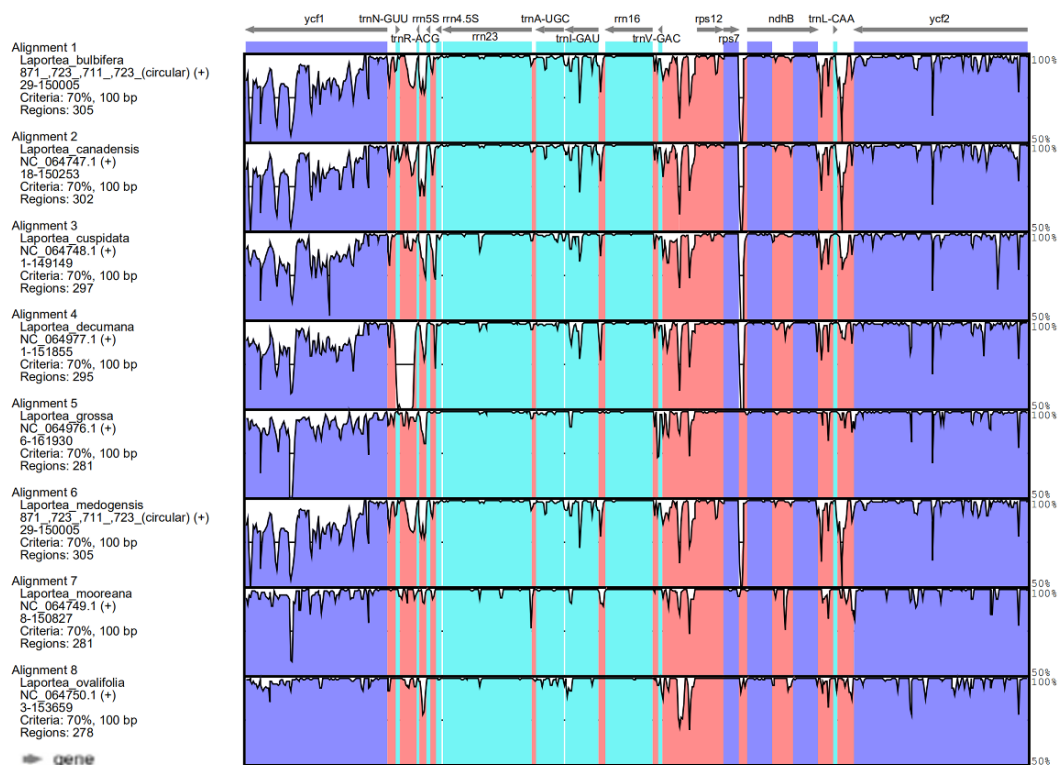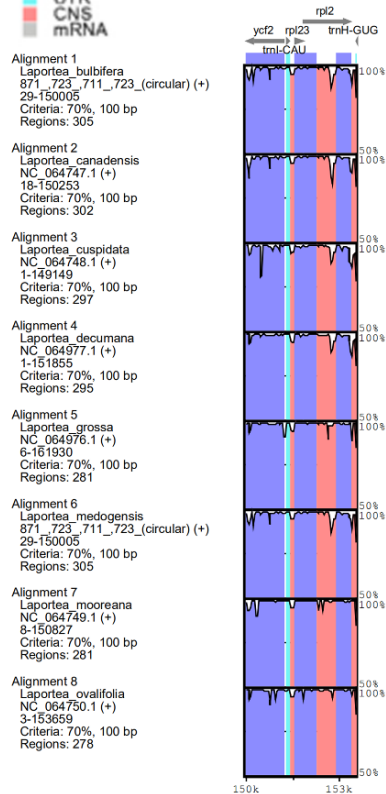

Figure S2. The dN/dS values between each plastid gene in the *Laportera* species are shown as box plots.

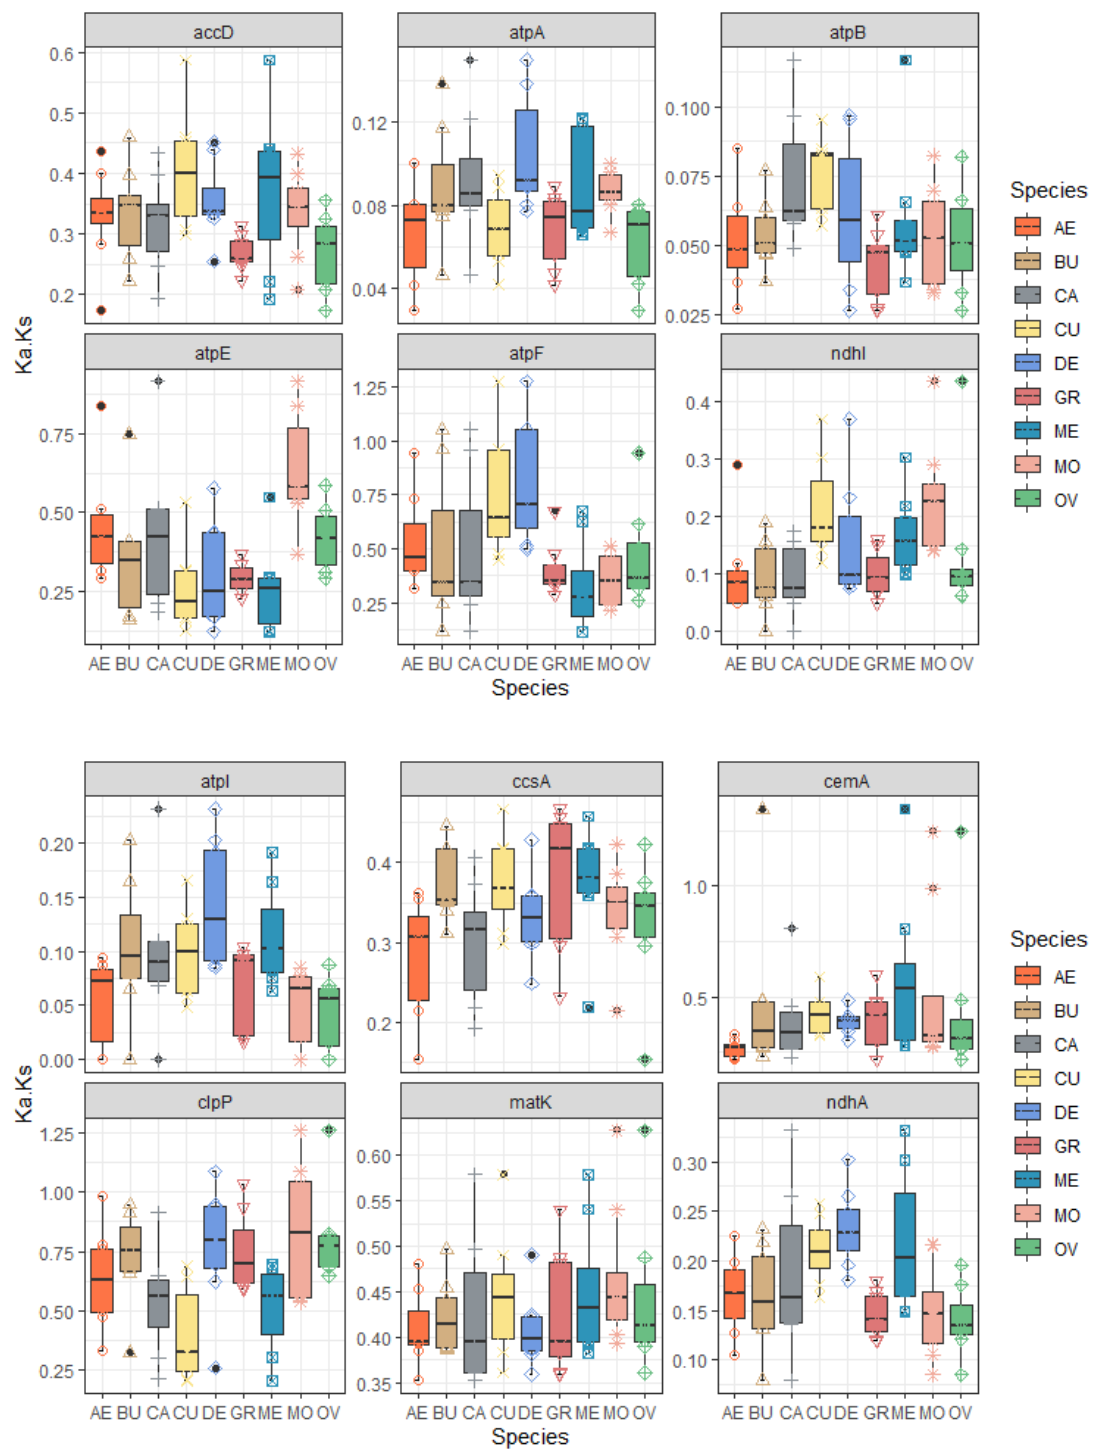

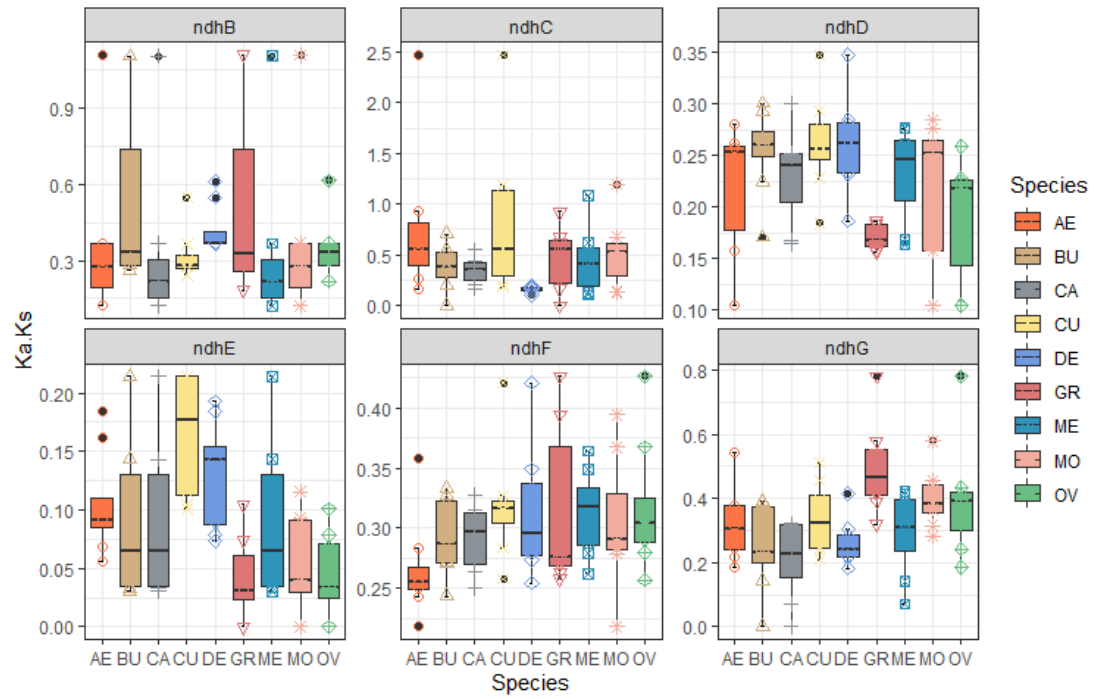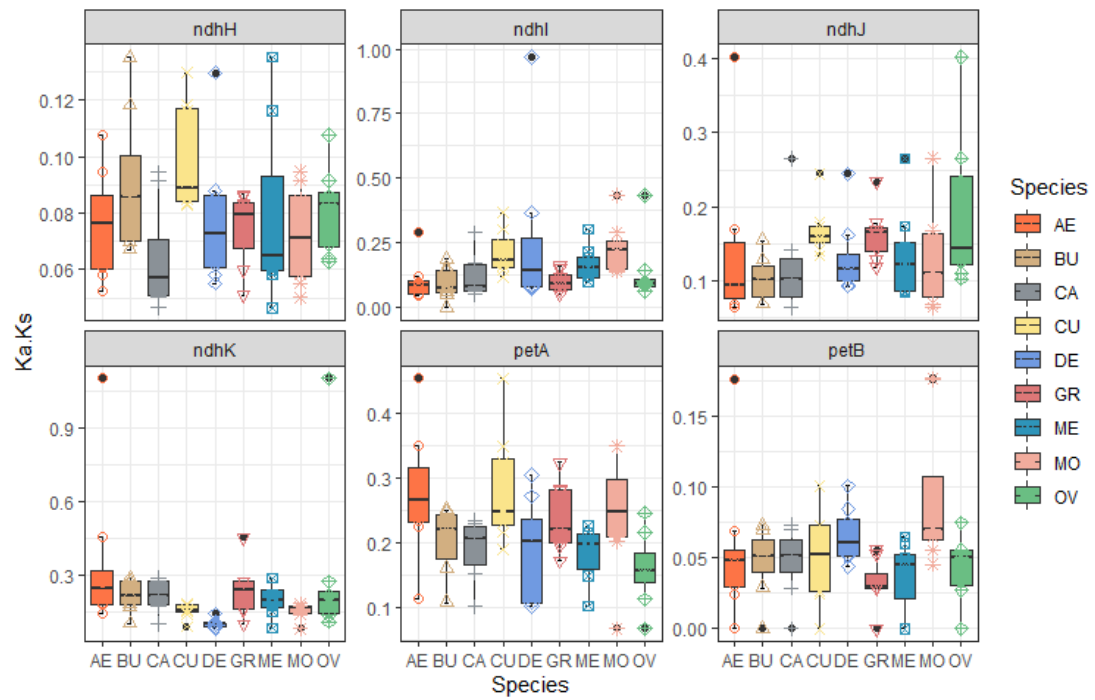

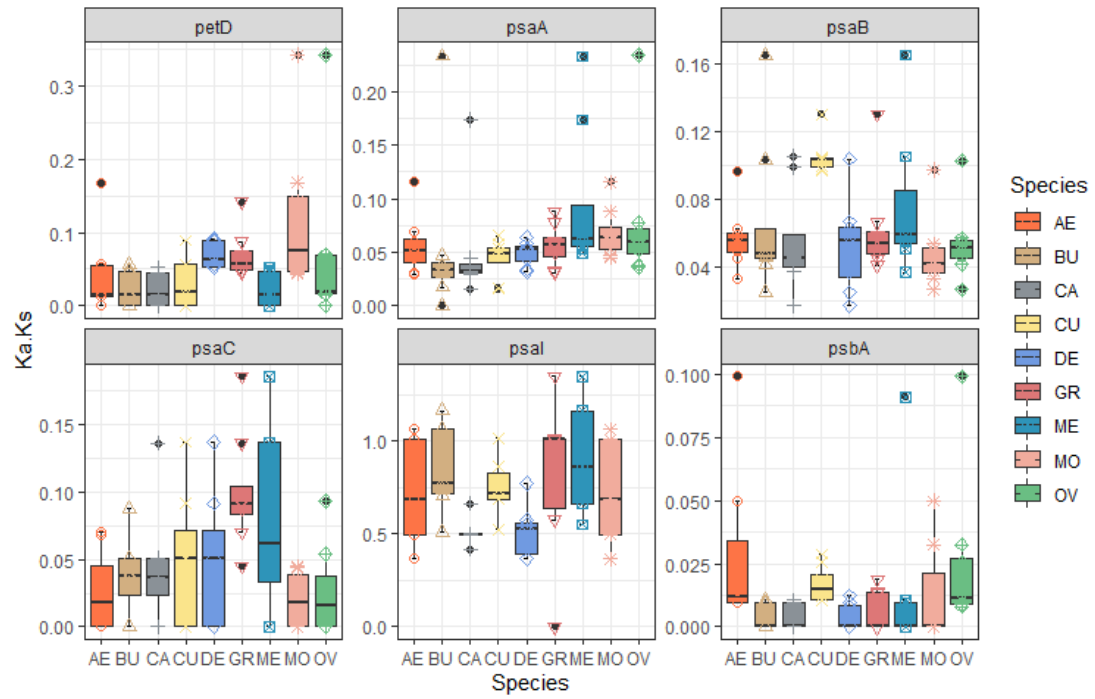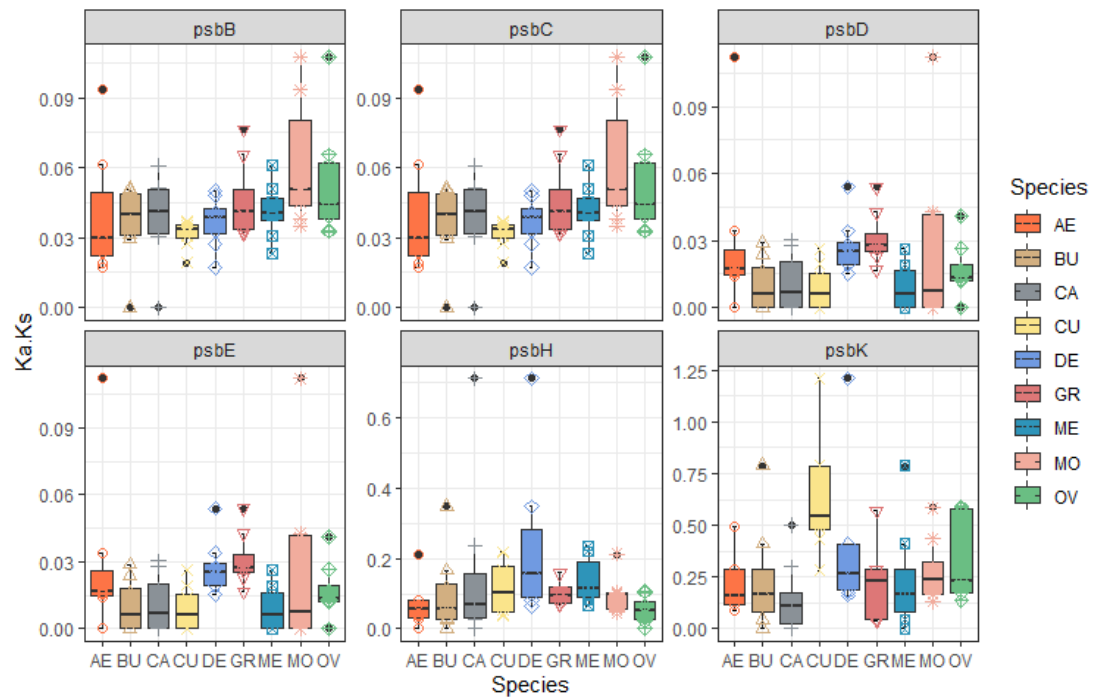

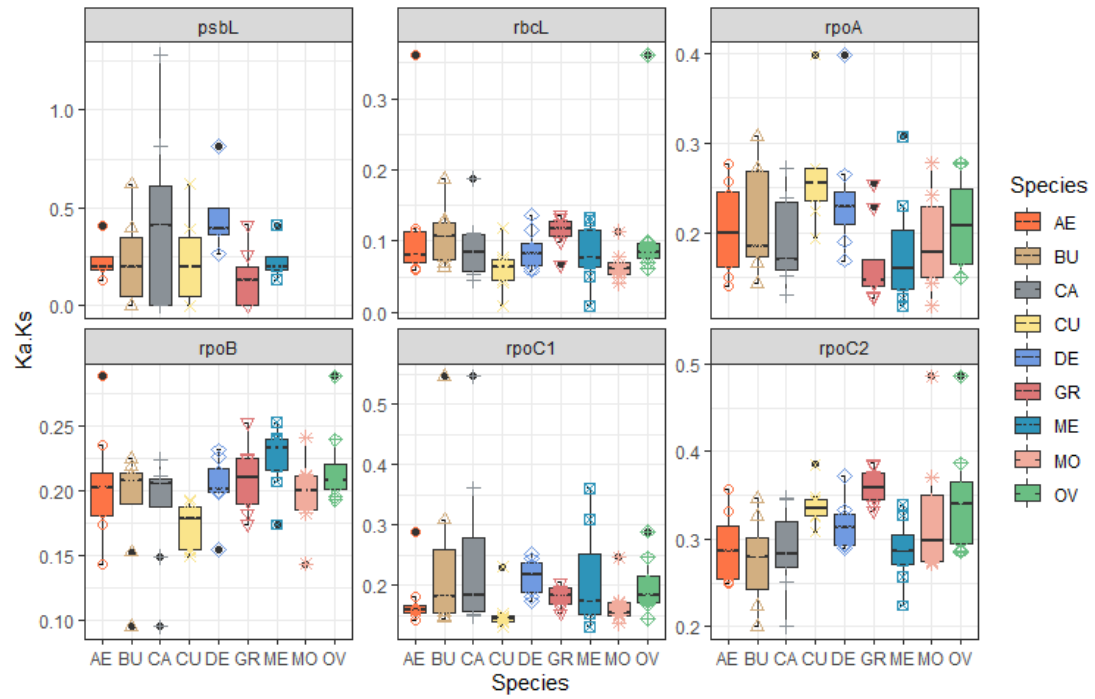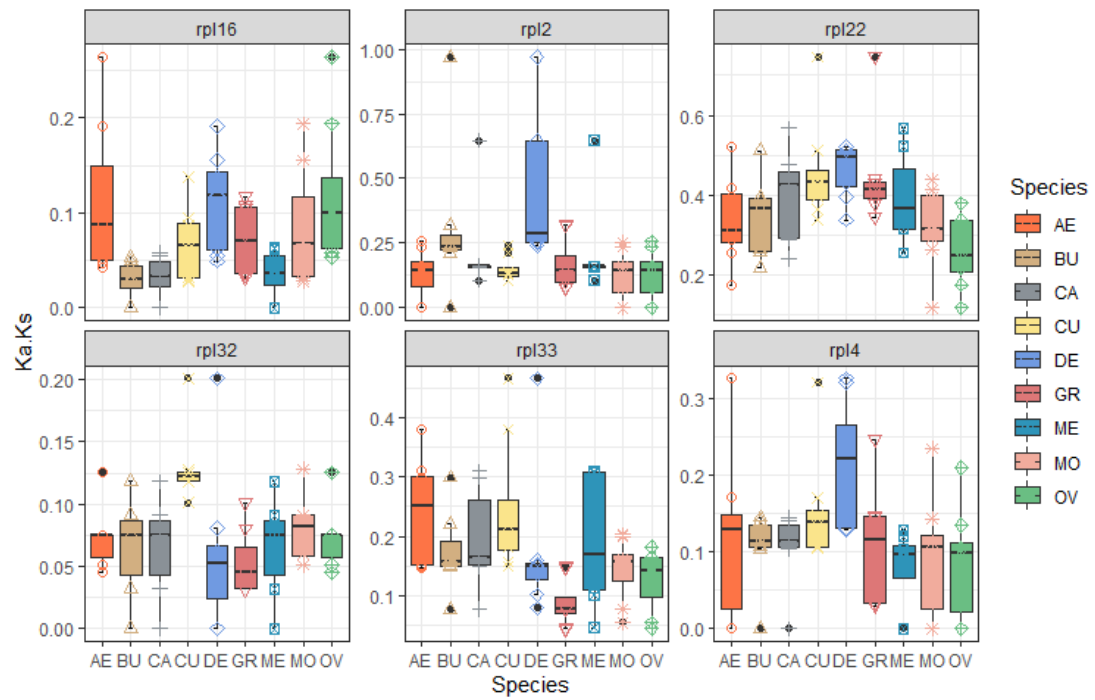

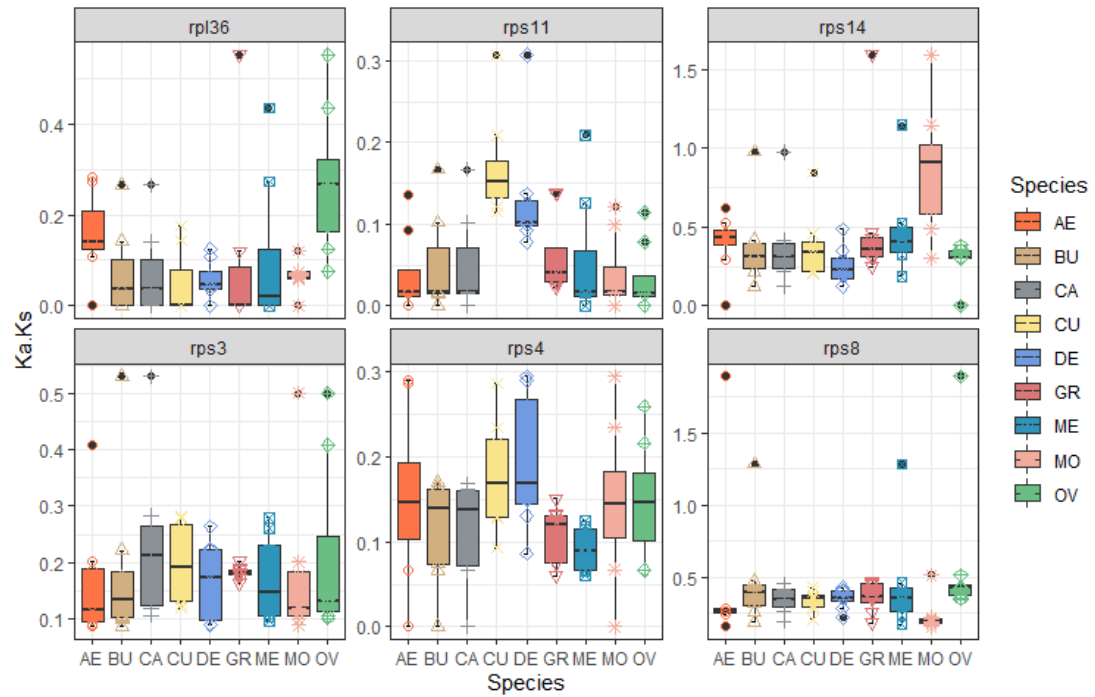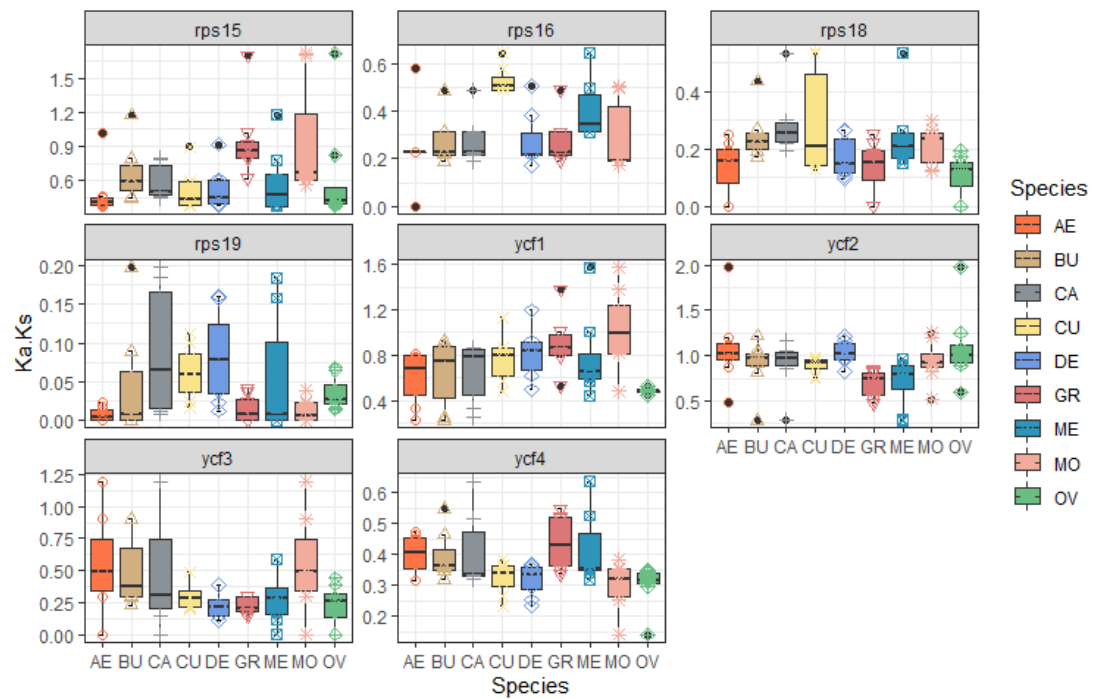

Tree scale: 0.01

*Laportea grossa* NC 064976  
*Laportea mooreana* NC 064749  
*Laportea ovalifolia* NC 064750  
*Laportea aestuans* NC 064746  
*Laportea decumana* NC 064977  
*Laportea cuspidata* NC 064748  
*Laportea medogensis* NC 064975  
*Laportea canadensis* NC 064747  
*Laportea bulbifera*  
*Boehmeria umbrosa* NC 036990  
*Debregeasia orientalis* NC 041413

(a) Phylogenetic tree showing relationships between various species. The tree is rooted at the bottom left and branches outwards. Species names and accession numbers are listed along the branches. Some branches are highlighted in red, and some are labeled 'Outgroup'.

(b) Phylogenetic tree showing relationships between various species. The tree is rooted at the bottom left and branches outwards. Species names and accession numbers are listed along the branches. Some branches are highlighted in red, and some are labeled 'Outgroup'.

(c) Phylogenetic tree showing relationships between various species. The tree is rooted at the bottom left and branches outwards. Species names and accession numbers are listed along the branches. Some branches are highlighted in red, and some are labeled 'Outgroup'.
